# Supplementary material for: Spatiotemporal remodeling in the habenula marks the onset of depression
Source: Research Square preprint supplement (doi:10.21203/rs.3.rs-7773881/v1), 2025-11-19
Supplement: Supplementary file 1 [file 66c71508c76459a10e69a87c.xlsx]

## Sheet: Sheet1
Extended Figure 3a - Mann Whitney test
Comparison	U Statistic	N1	N2	P value	Effect size (r)
Day 1: Veh vs CORT	29.5	8	8	0.8337	0.078125
Day 7: Veh vs CORT	47	10	18	0.0355	0.477778
Day 21: Veh vs CORT	4	9	7	0.0014	0.873016
Extended Figure 3d - Student's t-test
Comparison	T Statistic	DF	P value	CI95%	Cohen-d
Baseline 1: Veh vs CORT	1.8027	646	0.0719016	[-0. 0.02]	0.159215
Baseline 2: Veh vs CORT	1.6685	646	0.095702	[-0. 0.02]	0.147362
D21: Veh vs CORT	9.2255	646	3.95743e-19	[0.04 0.06]	0.814798
Figure 2f - 2 way mixed ANOVA
Factors	F Statistic	DF1	DF2	P value	Effect size
cluster	268.762	5	466	8.77617e-135	0.742514
session	30.2231	5	2330	7.38013e-30	0.0609062
Interaction	25.656	25	2330	3.03427e-104	0.215858
Figure 2f - Post-hoc pairwise comparisons with Benjamini-Hochberg procedure (FDR)
Pairwise comparison	Cluster	Factor 1	Factor 2	T statistic	DF	P value adjusted	Effect size (Cohen)
cluster	-	1	2	11.1457	83.6378	4.89469e-18	2.06291
cluster	-	1	3	15.3456	91.2421	1.56071e-26	2.7467
cluster	-	1	4	25.5908	62.3092	3.45383e-34	4.81291
cluster	-	1	5	25.1625	106.68	1.71571e-45	4.65719
cluster	-	1	6	25.0628	41.9325	1.84066e-26	6.51122
cluster	-	2	3	5.6978	182	5.15174e-08	0.840095
cluster	-	2	4	18.2716	170.078	4.30992e-41	2.49121
cluster	-	2	5	18.6427	110.654	3.12584e-35	3.18212
cluster	-	2	6	19.2313	30.817	1.68785e-18	4.69663
cluster	-	3	4	10.4675	157.386	1.61257e-19	1.46227
cluster	-	3	5	13.7927	118.888	4.25163e-26	2.31756
cluster	-	3	6	15.353	33.0537	1.81336e-16	3.53095
cluster	-	4	5	7.73661	86.4122	2.1917e-11	1.36346
cluster	-	4	6	10.4766	25.2312	1.29229e-10	2.74932
cluster	-	5	6	3.69679	46.9339	0.000570478	0.801118
session	-	Longitudinal_CORT_Bas01	Longitudinal_CORT_Bas02	-0.0735218	471	0.941422	-0.0027272
session	-	Longitudinal_CORT_Bas01	Longitudinal_CORT_CORT01	0.58898	471	0.595882	0.0247546
session	-	Longitudinal_CORT_Bas01	Longitudinal_CORT_CORT07	-1.74246	471	0.1026	-0.0794145
session	-	Longitudinal_CORT_Bas01	Longitudinal_CORT_CORT14	-4.62036	471	1.06101e-05	-0.220839
session	-	Longitudinal_CORT_Bas01	Longitudinal_CORT_CORT21	-6.81659	471	1.43202e-10	-0.36039
session	-	Longitudinal_CORT_Bas02	Longitudinal_CORT_CORT01	0.766143	471	0.512279	0.0285336
session	-	Longitudinal_CORT_Bas02	Longitudinal_CORT_CORT07	-1.8499	471	0.0885741	-0.0792837
session	-	Longitudinal_CORT_Bas02	Longitudinal_CORT_CORT14	-4.83937	471	4.42063e-06	-0.224935
session	-	Longitudinal_CORT_Bas02	Longitudinal_CORT_CORT21	-6.91028	471	1.18312e-10	-0.370373
session	-	Longitudinal_CORT_CORT01	Longitudinal_CORT_CORT07	-2.65021	471	0.0124724	-0.11309
session	-	Longitudinal_CORT_CORT01	Longitudinal_CORT_CORT14	-5.63374	471	9.11445e-08	-0.2614
session	-	Longitudinal_CORT_CORT01	Longitudinal_CORT_CORT21	-7.62179	471	2.08326e-12	-0.416981
session	-	Longitudinal_CORT_CORT07	Longitudinal_CORT_CORT14	-3.91741	471	0.000192664	-0.159759
session	-	Longitudinal_CORT_CORT07	Longitudinal_CORT_CORT21	-6.73028	471	1.8502e-10	-0.310329
session	-	Longitudinal_CORT_CORT14	Longitudinal_CORT_CORT21	-2.8681	471	0.00719123	-0.125887
cluster * session	1	Longitudinal_CORT_Bas01	Longitudinal_CORT_Bas02	1.78174	44	0.153175	0.377549
cluster * session	1	Longitudinal_CORT_Bas01	Longitudinal_CORT_CORT01	4.87743	44	5.02221e-05	0.920887
cluster * session	1	Longitudinal_CORT_Bas01	Longitudinal_CORT_CORT07	2.31587	44	0.052927	0.472108
cluster * session	1	Longitudinal_CORT_Bas01	Longitudinal_CORT_CORT14	0.257426	44	0.877586	0.0470516
cluster * session	1	Longitudinal_CORT_Bas01	Longitudinal_CORT_CORT21	-1.11288	44	0.436829	-0.254227
cluster * session	1	Longitudinal_CORT_Bas02	Longitudinal_CORT_CORT01	4.12262	44	0.000473848	0.556876
cluster * session	1	Longitudinal_CORT_Bas02	Longitudinal_CORT_CORT07	0.416318	44	0.781502	0.0866385
cluster * session	1	Longitudinal_CORT_Bas02	Longitudinal_CORT_CORT14	-1.67018	44	0.18357	-0.33392
cluster * session	1	Longitudinal_CORT_Bas02	Longitudinal_CORT_CORT21	-2.73888	44	0.0194656	-0.710004
cluster * session	1	Longitudinal_CORT_CORT01	Longitudinal_CORT_CORT07	-2.4857	44	0.0360019	-0.489385
cluster * session	1	Longitudinal_CORT_CORT01	Longitudinal_CORT_CORT14	-5.23454	44	1.81139e-05	-0.88479
cluster * session	1	Longitudinal_CORT_CORT01	Longitudinal_CORT_CORT21	-5.65177	44	5.46871e-06	-1.38568
cluster * session	1	Longitudinal_CORT_CORT07	Longitudinal_CORT_CORT14	-2.2113	44	0.06598	-0.428749
cluster * session	1	Longitudinal_CORT_CORT07	Longitudinal_CORT_CORT21	-4.87595	44	5.02221e-05	-0.83948
cluster * session	1	Longitudinal_CORT_CORT14	Longitudinal_CORT_CORT21	-1.48753	44	0.249243	-0.312828
cluster * session	2	Longitudinal_CORT_Bas01	Longitudinal_CORT_Bas02	0.405605	91	0.781502	0.0568044
cluster * session	2	Longitudinal_CORT_Bas01	Longitudinal_CORT_CORT01	3.50081	91	0.00185292	0.440716
cluster * session	2	Longitudinal_CORT_Bas01	Longitudinal_CORT_CORT07	5.07515	91	8.73431e-06	0.663083
cluster * session	2	Longitudinal_CORT_Bas01	Longitudinal_CORT_CORT14	3.82233	91	0.000679535	0.518569
cluster * session	2	Longitudinal_CORT_Bas01	Longitudinal_CORT_CORT21	6.93032	91	4.40229e-09	1.04877
cluster * session	2	Longitudinal_CORT_Bas02	Longitudinal_CORT_CORT01	3.25001	91	0.00383256	0.417941
cluster * session	2	Longitudinal_CORT_Bas02	Longitudinal_CORT_CORT07	4.84258	91	2.04494e-05	0.655988
cluster * session	2	Longitudinal_CORT_Bas02	Longitudinal_CORT_CORT14	3.61428	91	0.0013457	0.50046
cluster * session	2	Longitudinal_CORT_Bas02	Longitudinal_CORT_CORT21	6.47538	91	3.03203e-08	1.09325
cluster * session	2	Longitudinal_CORT_CORT01	Longitudinal_CORT_CORT07	1.89091	91	0.120947	0.22547
cluster * session	2	Longitudinal_CORT_CORT01	Longitudinal_CORT_CORT14	0.789325	91	0.598117	0.101541
cluster * session	2	Longitudinal_CORT_CORT01	Longitudinal_CORT_CORT21	3.44741	91	0.00214712	0.517323
cluster * session	2	Longitudinal_CORT_CORT07	Longitudinal_CORT_CORT14	-0.989535	91	0.50435	-0.113238
cluster * session	2	Longitudinal_CORT_CORT07	Longitudinal_CORT_CORT21	1.70102	91	0.169631	0.244974
cluster * session	2	Longitudinal_CORT_CORT14	Longitudinal_CORT_CORT21	2.86591	91	0.0116202	0.363418
cluster * session	3	Longitudinal_CORT_Bas01	Longitudinal_CORT_Bas02	-2.07425	91	0.0817621	-0.300547
cluster * session	3	Longitudinal_CORT_Bas01	Longitudinal_CORT_CORT01	-1.49856	91	0.242559	-0.197408
cluster * session	3	Longitudinal_CORT_Bas01	Longitudinal_CORT_CORT07	-5.14977	91	6.85225e-06	-0.721447
cluster * session	3	Longitudinal_CORT_Bas01	Longitudinal_CORT_CORT14	-6.84733	91	5.9614e-09	-0.928867
cluster * session	3	Longitudinal_CORT_Bas01	Longitudinal_CORT_CORT21	-13.918	91	2.61737e-22	-2.19955
cluster * session	3	Longitudinal_CORT_Bas02	Longitudinal_CORT_CORT01	0.483334	91	0.736386	0.060419
cluster * session	3	Longitudinal_CORT_Bas02	Longitudinal_CORT_CORT07	-3.37419	91	0.00264994	-0.444728
cluster * session	3	Longitudinal_CORT_Bas02	Longitudinal_CORT_CORT14	-5.74978	91	7.08997e-07	-0.715749
cluster * session	3	Longitudinal_CORT_Bas02	Longitudinal_CORT_CORT21	-12.7072	91	1.59757e-20	-1.91214
cluster * session	3	Longitudinal_CORT_CORT01	Longitudinal_CORT_CORT07	-3.56141	91	0.00155969	-0.443766
cluster * session	3	Longitudinal_CORT_CORT01	Longitudinal_CORT_CORT14	-5.23545	91	5.46871e-06	-0.701967
cluster * session	3	Longitudinal_CORT_CORT01	Longitudinal_CORT_CORT21	-11.6987	91	1.40177e-18	-1.6784
cluster * session	3	Longitudinal_CORT_CORT07	Longitudinal_CORT_CORT14	-3.00559	91	0.00790372	-0.359956
cluster * session	3	Longitudinal_CORT_CORT07	Longitudinal_CORT_CORT21	-9.28179	91	1.04423e-13	-1.31995
cluster * session	3	Longitudinal_CORT_CORT14	Longitudinal_CORT_CORT21	-4.43797	91	8.47259e-05	-0.62395
cluster * session	4	Longitudinal_CORT_Bas01	Longitudinal_CORT_Bas02	-0.0428368	155	0.96718	-0.0050444
cluster * session	4	Longitudinal_CORT_Bas01	Longitudinal_CORT_CORT01	-0.62206	155	0.658704	-0.069197
cluster * session	4	Longitudinal_CORT_Bas01	Longitudinal_CORT_CORT07	0.645204	155	0.658704	0.0725721
cluster * session	4	Longitudinal_CORT_Bas01	Longitudinal_CORT_CORT14	0.0899898	155	0.96718	0.0103941
cluster * session	4	Longitudinal_CORT_Bas01	Longitudinal_CORT_CORT21	0.752202	155	0.598539	0.0883849
cluster * session	4	Longitudinal_CORT_Bas02	Longitudinal_CORT_CORT01	-0.747988	155	0.598539	-0.0642334
cluster * session	4	Longitudinal_CORT_Bas02	Longitudinal_CORT_CORT07	0.797055	155	0.598117	0.0756699
cluster * session	4	Longitudinal_CORT_Bas02	Longitudinal_CORT_CORT14	0.142762	155	0.949996	0.0144012
cluster * session	4	Longitudinal_CORT_Bas02	Longitudinal_CORT_CORT21	0.816215	155	0.593757	0.0915265
cluster * session	4	Longitudinal_CORT_CORT01	Longitudinal_CORT_CORT07	1.36662	155	0.295	0.122105
cluster * session	4	Longitudinal_CORT_CORT01	Longitudinal_CORT_CORT14	0.74515	155	0.598539	0.0693952
cluster * session	4	Longitudinal_CORT_CORT01	Longitudinal_CORT_CORT21	1.21975	155	0.367219	0.139964
cluster * session	4	Longitudinal_CORT_CORT07	Longitudinal_CORT_CORT14	-0.615684	155	0.658704	-0.0535042
cluster * session	4	Longitudinal_CORT_CORT07	Longitudinal_CORT_CORT21	-0.0511658	155	0.96718	-0.00559512
cluster * session	4	Longitudinal_CORT_CORT14	Longitudinal_CORT_CORT21	0.558064	155	0.684007	0.0590812
cluster * session	5	Longitudinal_CORT_Bas01	Longitudinal_CORT_Bas02	0.0653497	64	0.96718	0.00938561
cluster * session	5	Longitudinal_CORT_Bas01	Longitudinal_CORT_CORT01	-4.36983	64	0.000144473	-0.643936
cluster * session	5	Longitudinal_CORT_Bas01	Longitudinal_CORT_CORT07	-8.1534	64	1.72992e-10	-1.20957
cluster * session	5	Longitudinal_CORT_Bas01	Longitudinal_CORT_CORT14	-8.02091	64	2.42293e-10	-1.33317
cluster * session	5	Longitudinal_CORT_Bas01	Longitudinal_CORT_CORT21	-15.7619	64	4.61126e-22	-2.60828
cluster * session	5	Longitudinal_CORT_Bas02	Longitudinal_CORT_CORT01	-4.75151	64	4.43537e-05	-0.616902
cluster * session	5	Longitudinal_CORT_Bas02	Longitudinal_CORT_CORT07	-10.122	64	9.79164e-14	-1.1515
cluster * session	5	Longitudinal_CORT_Bas02	Longitudinal_CORT_CORT14	-8.1239	64	1.75485e-10	-1.28124
cluster * session	5	Longitudinal_CORT_Bas02	Longitudinal_CORT_CORT21	-14.5393	64	1.59757e-20	-2.40716
cluster * session	5	Longitudinal_CORT_CORT01	Longitudinal_CORT_CORT07	-4.40989	64	0.000129897	-0.519298
cluster * session	5	Longitudinal_CORT_CORT01	Longitudinal_CORT_CORT14	-5.30086	64	6.85225e-06	-0.706467
cluster * session	5	Longitudinal_CORT_CORT01	Longitudinal_CORT_CORT21	-9.37433	64	1.42024e-12	-1.59275
cluster * session	5	Longitudinal_CORT_CORT07	Longitudinal_CORT_CORT14	-1.85691	64	0.130074	-0.234257
cluster * session	5	Longitudinal_CORT_CORT07	Longitudinal_CORT_CORT21	-5.93034	64	7.49656e-07	-0.97312
cluster * session	5	Longitudinal_CORT_CORT14	Longitudinal_CORT_CORT21	-4.05952	64	0.000409061	-0.585581
cluster * session	6	Longitudinal_CORT_Bas01	Longitudinal_CORT_Bas02	-0.83718	21	0.593757	-0.199939
cluster * session	6	Longitudinal_CORT_Bas01	Longitudinal_CORT_CORT01	0.257134	21	0.877586	0.0614335
cluster * session	6	Longitudinal_CORT_Bas01	Longitudinal_CORT_CORT07	-0.620506	21	0.658704	-0.148805
cluster * session	6	Longitudinal_CORT_Bas01	Longitudinal_CORT_CORT14	-0.972538	21	0.52147	-0.259667
cluster * session	6	Longitudinal_CORT_Bas01	Longitudinal_CORT_CORT21	0.0416383	21	0.96718	0.0118131
cluster * session	6	Longitudinal_CORT_Bas02	Longitudinal_CORT_CORT01	0.952126	21	0.527797	0.248702
cluster * session	6	Longitudinal_CORT_Bas02	Longitudinal_CORT_CORT07	0.0717806	21	0.96718	0.0192813
cluster * session	6	Longitudinal_CORT_Bas02	Longitudinal_CORT_CORT14	-0.321351	21	0.845011	-0.0936571
cluster * session	6	Longitudinal_CORT_Bas02	Longitudinal_CORT_CORT21	0.836252	21	0.593757	0.22814
cluster * session	6	Longitudinal_CORT_CORT01	Longitudinal_CORT_CORT07	-0.718955	21	0.617263	-0.19337
cluster * session	6	Longitudinal_CORT_CORT01	Longitudinal_CORT_CORT14	-1.09721	21	0.449957	-0.299375
cluster * session	6	Longitudinal_CORT_CORT01	Longitudinal_CORT_CORT21	-0.222285	21	0.895922	-0.0558447
cluster * session	6	Longitudinal_CORT_CORT07	Longitudinal_CORT_CORT14	-0.582866	21	0.679429	-0.100647
cluster * session	6	Longitudinal_CORT_CORT07	Longitudinal_CORT_CORT21	0.754581	21	0.598539	0.166641
cluster * session	6	Longitudinal_CORT_CORT14	Longitudinal_CORT_CORT21	1.33948	21	0.324553	0.282391
Figure 2i - 2 way mixed ANOVA
Factors	F Statistic	DF1	DF2	P value	Effect size
ML_bin	4.92721	2	332	0.00778541	0.0288264
session	48.0362	5	1660	1.59902e-46	0.126399
Interaction	3.51665	10	1660	0.000130745	0.0207452
Figure 2i - Post-hoc pairwise comparisons with Benjamini-Hochberg procedure (FDR)
Pairwise comparison	Session	Factor 1	Factor 2	T statistic	DF	P value adjusted	Effect size (Cohen)
session	-	Longitudinal_CORT_Bas01	Longitudinal_CORT_Bas02	-1.36737	334	0.172428	-0.105652
session	-	Longitudinal_CORT_Bas01	Longitudinal_CORT_CORT01	-3.14896	334	0.00206883	-0.24331
session	-	Longitudinal_CORT_Bas01	Longitudinal_CORT_CORT07	-5.88104	334	2.1203e-08	-0.454409
session	-	Longitudinal_CORT_Bas01	Longitudinal_CORT_CORT14	-7.50361	334	2.12906e-12	-0.579779
session	-	Longitudinal_CORT_Bas01	Longitudinal_CORT_CORT21	-11.3395	334	2.94611e-24	-0.876168
session	-	Longitudinal_CORT_Bas02	Longitudinal_CORT_CORT01	-2.16374	334	0.0334206	-0.111362
session	-	Longitudinal_CORT_Bas02	Longitudinal_CORT_CORT07	-5.23049	334	4.98346e-07	-0.277843
session	-	Longitudinal_CORT_Bas02	Longitudinal_CORT_CORT14	-6.95444	334	4.67845e-11	-0.409325
session	-	Longitudinal_CORT_Bas02	Longitudinal_CORT_CORT21	-10.6081	334	5.63116e-22	-0.641198
session	-	Longitudinal_CORT_CORT01	Longitudinal_CORT_CORT07	-3.14785	334	0.00206883	-0.160923
session	-	Longitudinal_CORT_CORT01	Longitudinal_CORT_CORT14	-5.2914	334	4.12869e-07	-0.298794
session	-	Longitudinal_CORT_CORT01	Longitudinal_CORT_CORT21	-8.62553	334	1.30992e-15	-0.518289
session	-	Longitudinal_CORT_CORT07	Longitudinal_CORT_CORT14	-3.23406	334	0.0018305	-0.149591
session	-	Longitudinal_CORT_CORT07	Longitudinal_CORT_CORT21	-7.32331	334	5.4757e-12	-0.361961
session	-	Longitudinal_CORT_CORT14	Longitudinal_CORT_CORT21	-4.09447	334	7.96907e-05	-0.193597
ML_bin	-	200	400	-2.61828	159.651	0.0145321	-0.364554
ML_bin	-	200	600	-3.4513	146.857	0.00218637	-0.492465
ML_bin	-	400	600	-0.769134	263.664	0.442502	-0.0938904
session * ML_bin	Longitudinal_CORT_Bas02	200	400	-0.817997	169.141	0.518137	-0.111266
session * ML_bin	Longitudinal_CORT_Bas02	200	600	-1.65841	168.586	0.212344	-0.224207
session * ML_bin	Longitudinal_CORT_Bas02	400	600	-0.853537	266.845	0.518137	-0.104091
session * ML_bin	Longitudinal_CORT_CORT01	200	400	-0.703525	184.416	0.556864	-0.0918821
session * ML_bin	Longitudinal_CORT_CORT01	200	600	-1.67639	180.316	0.212344	-0.220026
session * ML_bin	Longitudinal_CORT_CORT01	400	600	-0.907857	265.863	0.518137	-0.110766
session * ML_bin	Longitudinal_CORT_CORT07	200	400	-1.3875	169.211	0.312227	-0.188699
session * ML_bin	Longitudinal_CORT_CORT07	200	600	-2.7539	154.766	0.0247293	-0.385161
session * ML_bin	Longitudinal_CORT_CORT07	400	600	-1.32194	262.734	0.312227	-0.161401
session * ML_bin	Longitudinal_CORT_CORT14	200	400	-2.48232	150.295	0.0424587	-0.353726
session * ML_bin	Longitudinal_CORT_CORT14	200	600	-2.99726	144.374	0.0160403	-0.430455
session * ML_bin	Longitudinal_CORT_CORT14	400	600	-0.518044	266.02	0.648062	-0.0632024
session * ML_bin	Longitudinal_CORT_CORT21	200	400	-4.1675	141.139	0.000801429	-0.608033
session * ML_bin	Longitudinal_CORT_CORT21	200	600	-3.96119	128.538	0.00092169	-0.594691
session * ML_bin	Longitudinal_CORT_CORT21	400	600	0.427183	263.363	0.669595	0.0521505
Extended Figure 3k - 2 way mixed ANOVA
Factors	F Statistic	DF1	DF2	P value	Effect size
ML_bin	3.38495	2	133	0.0368234	0.0484361
session	9.18497	5	665	1.82649e-08	0.0645987
Interaction	1.69087	10	665	0.0789699	0.0247961
Extended Figure 3k - Post-hoc pairwise comparisons with Benjamini-Hochberg procedure (FDR)
Pairwise comparison	Session	Factor 1	Factor 2	T statistic	DF	P value adjusted	Effect size (Cohen)
session	-	Longitudinal_CORT_Bas01	Longitudinal_CORT_Bas02	1.48754	135	0.189823	0.180391
session	-	Longitudinal_CORT_Bas01	Longitudinal_CORT_CORT01	5.60061	135	1.72644e-06	0.679174
session	-	Longitudinal_CORT_Bas01	Longitudinal_CORT_CORT07	5.37709	135	2.42759e-06	0.652068
session	-	Longitudinal_CORT_Bas01	Longitudinal_CORT_CORT14	3.14203	135	0.00515631	0.381027
session	-	Longitudinal_CORT_Bas01	Longitudinal_CORT_CORT21	3.74969	135	0.000785191	0.454717
session	-	Longitudinal_CORT_Bas02	Longitudinal_CORT_CORT01	4.84005	135	1.74807e-05	0.330373
session	-	Longitudinal_CORT_Bas02	Longitudinal_CORT_CORT07	3.96422	135	0.00044559	0.327051
session	-	Longitudinal_CORT_Bas02	Longitudinal_CORT_CORT14	1.66065	135	0.148656	0.146248
session	-	Longitudinal_CORT_Bas02	Longitudinal_CORT_CORT21	2.17808	135	0.0583822	0.209177
session	-	Longitudinal_CORT_CORT01	Longitudinal_CORT_CORT07	0.0590347	135	0.953012	0.00474722
session	-	Longitudinal_CORT_CORT01	Longitudinal_CORT_CORT14	-2.02544	135	0.0746554	-0.175097
session	-	Longitudinal_CORT_CORT01	Longitudinal_CORT_CORT21	-1.04284	135	0.344871	-0.102024
session	-	Longitudinal_CORT_CORT07	Longitudinal_CORT_CORT14	-2.2013	135	0.0583822	-0.175533
session	-	Longitudinal_CORT_CORT07	Longitudinal_CORT_CORT21	-1.36397	135	0.218559	-0.104174
session	-	Longitudinal_CORT_CORT14	Longitudinal_CORT_CORT21	0.85649	135	0.421333	0.0657267
ML_bin	-	200	400	-0.672973	59.8364	0.503555	-0.159203
ML_bin	-	200	600	1.6656	67.3638	0.150655	0.334932
ML_bin	-	400	600	2.50266	105.008	0.0416044	0.46882
session * ML_bin	Longitudinal_CORT_Bas02	200	400	-0.875261	69.8243	0.480541	-0.186831
session * ML_bin	Longitudinal_CORT_Bas02	200	600	1.96629	86.2819	0.194271	0.351163
session * ML_bin	Longitudinal_CORT_Bas02	400	600	2.49316	101.311	0.0714044	0.474911
session * ML_bin	Longitudinal_CORT_CORT01	200	400	-1.23455	59.1969	0.416019	-0.293144
session * ML_bin	Longitudinal_CORT_CORT01	200	600	1.05334	61.9229	0.480541	0.219057
session * ML_bin	Longitudinal_CORT_CORT01	400	600	2.51325	102.405	0.0714044	0.476688
session * ML_bin	Longitudinal_CORT_CORT07	200	400	0.886809	49.095	0.480541	0.223469
session * ML_bin	Longitudinal_CORT_CORT07	200	600	1.89411	44.2585	0.194271	0.45584
session * ML_bin	Longitudinal_CORT_CORT07	400	600	1.25725	96.0965	0.416019	0.24369
session * ML_bin	Longitudinal_CORT_CORT14	200	400	-0.793588	59.2197	0.49685	-0.188413
session * ML_bin	Longitudinal_CORT_CORT14	200	600	0.0535448	62.2818	0.957469	0.0111097
session * ML_bin	Longitudinal_CORT_CORT14	400	600	0.932707	102.63	0.480541	0.176742
session * ML_bin	Longitudinal_CORT_CORT21	200	400	-0.699218	48.5282	0.522594	-0.176824
session * ML_bin	Longitudinal_CORT_CORT21	200	600	1.34625	49.1363	0.416019	0.308465
session * ML_bin	Longitudinal_CORT_CORT21	400	600	2.62602	102.811	0.0714044	0.497235
Figure 3d - 2 way mixed ANOVA
Factors	F Statistic	DF1	DF2	P value	Effect size
Group	8.51571	1	559	0.0036626	0.0150052
Session	7.71894	1	559	0.00564809	0.0136204
Interaction	9.90047	1	559	0.00174033	0.0174028
Figure 3d - Post-hoc pairwise comparisons with Bonferroni correction
Pairwise comparison	Session	Factor 1	Factor 2	T statistic	DF	P value adjusted	Effect size (Cohen)
Session	-	t7	t0	2.75648	560	0.00603319	0.108737
Group	-	ketamine	vehicle	-2.91898	558.996	0.00365324	-0.24643
Session * group	t7	ketamine	vehicle	-4.29094	553.605	4.20014e-05	-0.361797
Session * group	t0	ketamine	vehicle	-1.05637	553.702	0.582522	-0.089288
Figure 3h - 2 way ANOVA
Factors	F Statistic	DF	P value	Effect size
ML_bin	1.16801	2	0.312658	0.00914877
Group	6.27677	1	0.0128623	0.0242087
ML_bin * group	0.982218	2	0.375903	0.00770475
Residual		253
Figure 3h - Post-hoc pairwise comparisons with Benjamini-Hochberg procedure (FDR)
Pairwise comparison	ML Bin	Factor 1	Factor 2	T statistic	DF	P value adjusted	Effect size (Cohen)
ML_bin	-	200	400	-1.65855	122.448	0.299299	-0.257447
ML_bin	-	200	600	-0.630346	125.136	0.529617	-0.110222
ML_bin	-	400	600	1.07582	131.987	0.425957	0.160093
group	-	ketamine	vehicle	-2.74643	256.822	0.00645097	-0.337424
ML_bin * group	200	ketamine	vehicle	-0.492821	26.9156	0.626136	-0.156718
ML_bin * group	400	ketamine	vehicle	-1.43926	115.539	0.22917	-0.255371
ML_bin * group	600	ketamine	vehicle	-2.59515	29.647	0.0436731	-0.766395
Extended Figure 4e - 2 way ANOVA
Factors	F Statistic	DF	P value	Effect size
ML_bin	0.0300023	2	0.970449	0.000379632
group	0.004545	1	0.946335	2.8765e-05
ML_bin * group	0.782916	2	0.458836	0.00981308
Residual		158
